# Supplementary material for: Targeted Re-Sequencing Identified rs3106189 at the 5′ UTR of TAPBP and rs1052918 at the 3′ UTR of TCF3 to Be Associated with the Overall Survival of Colorectal Cancer Patients
Source: PLoS One. 2013 Aug 5;8(8):e70307. doi: 10.1371/journal.pone.0070307 (PMC3734069; doi:10.1371/journal.pone.0070307)
Supplement: Table S4 — List of primers used for SNP validation. (XLSX) [file pone.0070307.s005.xlsx]

## Sheet: Supp4
Table S4. List of primers used for SNP validation
Gene	SNP position	SNP ID	primers	product size of reference	product size of allele	product size of outer primers
MSX2	chr5:174156168_TC	rs4242182	CGCTCCTCTCTCTGTTCTCTAGGACAGAC CCTCAGGGTGCAGGTGGTAGGGCGCA GGGGAGGCCCGAAAGGAAAAAACCTAGA GTTCTGCCTCCTGCAGTCTTTTCGCCTT	144	257	346
ETV4	chr17:41622507_AG	rs79868029	CAAAAAACTCGCCCTCCAAGGGAGTC TGGGAGTAGGGACCGAGAAGAATGACAAA ACTTGGACCAGCAAGTGCCCTACACCT TAGGGTGGAATACCAGGGGCTACGGAG	482	268	695
ETV4	chr17:41598940_TC	rs2271957	ACTCAAACATGCAGAGTCATCAGATTACA AGATGTTAGGCATAATGGACAGGTAATCC ATAACAAAGATGGAAAAGCTGGAGGAAA TAGTAGCTGTTGAGTCGGAAATGTTCCT	280	172	394
KAT5	chr11:65481267_TG		CAGAATGGAGCCGCCCGTAGGGCGGT TTTCGCTTCCGTCCTGGCTGGGCTGTCC CGAGCCTGACCAGCCGCTCTCCTCCAG TGCCCGGCCCCAATGACTCATTTGAACA	252	378	576
TFDP1	chr13:114229392_GA	rs80186078	TTGTCCAATAGTTTGCTGGTATAGAG AATGCAAAATAACATCACTTACATGTT AGAAAGAAGGTATGTAAGGACTCTCTGT CATTTCTATTCAAATGAAACAGAAAGTC	240	432	619
ETV4	chr17:41622740_GT	rs2271959	TGACTCGCGGGCATTCTCCCCGCTTTTA GCAAGCTCCCATTTCCGGGCGATTTCTACG GGAGAAGTTTCGCCGTCGGACCCAGAGC TTGGGGAAACAGGCGGGGGTTCCAGAAT	430	239	611
TNKS2	chr10:93600480_GA	rs17107140	AAGATAAAGGGTAAATGCCAATGAGTA AAGTAAAAGTAAGGAAGAGAGTCCATCAC CCAGTAAATGACAAGGTGAAATAAGAATAC TAATCTCCTTGGCCATTATAAAATTCTC	358	238	540
TNKS2	chr10:93572984_CT	rs11186694	TGCATTGGTAAGACTGTTTACTTTGCT TCAGAATAGTTACAACATTAGTAAAAGGCG TTTCCATTAATTAGTTCTTGAATTGTTGAG GCAAGTATAATAGGCACTTTGTAGTCCA	410	228	581
