# Supplementary material for: Targeted Re-Sequencing Identified rs3106189 at the 5′ UTR of TAPBP and rs1052918 at the 3′ UTR of TCF3 to Be Associated with the Overall Survival of Colorectal Cancer Patients
Source: PLoS One. 2013 Aug 5;8(8):e70307. doi: 10.1371/journal.pone.0070307 (PMC3734069; doi:10.1371/journal.pone.0070307)
Supplement: Table S5 — SNP validation of 8 randomly selected SNPs. (XLSX) [file pone.0070307.s006.xlsx]

## Sheet: Supp5
Table S5. SNP validation of 8 randomly selected SNPs
Gene	SNP position	SNP ID	consequences	regulatory_elements	sample	variation detected in CRC	variation detected in CRN	variation detected in healthy samples
MSX2	chr5:174156168_TC	rs4242182	M129T	GR-alpha;GR-beta;	CRC;CRN	1	1	1
ETV4	chr17:41622507_AG	rs79868029	Intron	promoter(691+)#2	CRC;CRN	0.9545	0.9583	1
ETV4	chr17:41598940_TC	rs2271957	upstream	7bp to DHX8 splicing sites;	CRC;CRN	0.5455	0.5417	0.25
KAT5	chr11:65481267_TG		V213G		CRC;---	1	1	1
TFDP1	chr13:114229392_GA	rs80186078	upstream		CRC;---	1	1	0
ETV4	chr17:41622740_GT	rs2271959	Intron	5bp to ETV4 splicing sites;promoter(638-)#2	---;CRN	0.5909	0.625	0.75
TNKS2	chr10:93600480_GA	rs17107140	Intron	17bp to TNKS2 splicing sites;	CRC;CRN	0	0	0
TNKS2	chr10:93572984_CT	rs11186694	Intron	20bp to TNKS2 splicing sites;	CRC;CRN	0	0	0
